# Supplementary material for: Enhanced electrostatic discrimination of proteins on nanoparticle-coated surfaces
Source: Royal Society of Chemistry journal article supplement (doi:10.1039/c3tb20377h), 2013-01-01
Supplement: c3tb20377h.pdf [file c3tb20377h.pdf]

## Supporting Information

# Enhanced Electrostatic Discrimination of Proteins on Nanoparticle-coated Surfaces

Yisheng Xu, Yoni Engel, Yunfeng Yan, Kaimin Chen, Daniel F. Moyano,  
Vincent M. Rotello and Paul L. Dubin

Department of Chemistry, University of Massachusetts Amherst, MA 01003

### Dynamic light scattering:

The distribution of apparent diameters  $D_h$  was obtained from the distribution of mean apparent translational diffusion coefficients ( $D_T$ ) via

$$(1) \quad D_h = 2kT/(6\pi\eta D_T)$$

where  $k$  is the Boltzmann constant, and  $\eta$  is the solvent viscosity which was assumed to be that of water.

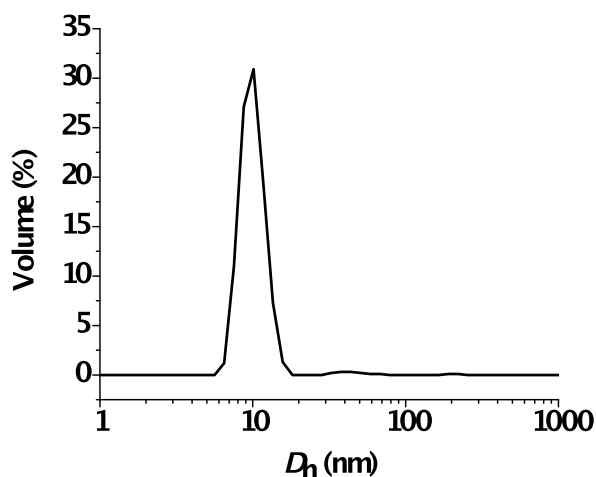

**Figure S1.** Dynamic light scattering (DLS) results for TTMA NP in pH 5.5, 5 mM phosphate buffer.

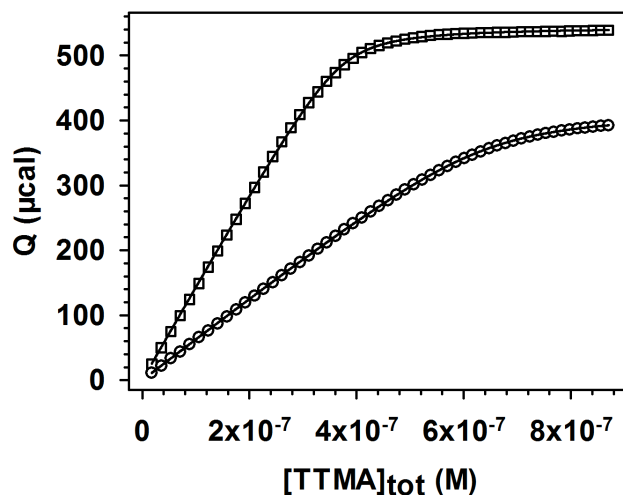

**Figure S2.** Binding isotherms for (□) BLGA–TTMA and (○) BLGB–TTMA from integration of the curves from raw ITC titration results. These values have been corrected for the heat change from protein dilution (see **Error! Reference source not found.** in Ref 1). Solid lines are fitting via a single independent site binding model.<sup>1</sup>

ITC experiments were performed by titrating TTMA into protein solution. The isotherms were obtained by integrating each exothermic peak and the results were given in Figure S2. By fitting with a single independent site binding model, the parameters were summarized in Table S1.

**Table S1.** Thermodynamic parameters obtained from equivalent, independent site-binding model for BLGA/B–TTMA.<sup>1</sup>

|           | $n$ | $K_b/$<br>$M^{-1}$ | $\Delta G/$<br>$\text{kcal mol}^{-1}$ |
|-----------|-----|--------------------|---------------------------------------|
| TTMA–BLGA | 54  | $3.8 \times 10^6$  | -9.1                                  |
| TTMA–BLGB | 31  | $2.1 \times 10^6$  | -8.7                                  |

#### Reference:

1. K. Chen, Y. Xu, S. Rana, O. R. Miranda, P. L. Dubin, V. M. Rotello, L. Sun and X. Guo, *Biomacromolecules*, 2011, **12**, 2552-2561.
